# Supplementary material for: Chronic migraine headache prevention with noninvasive vagus nerve stimulation: The EVENT study
Source: PubMed Central journal article supplement — Neurology. 2016 Aug 2;87(5):529–38. doi: 10.1212/WNL.0000000000002918 (PMC4970666; doi:10.1212/wnl.0000000000002918), 2016-08-02
Supplement: supp_WNL.0000000000002918_Figure_e-1.pdf [file supp_WNL.0000000000002918_Figure_e-1.pdf]

**Figure e-1. Non-invasive Vagus Nerve Stimulation Device**

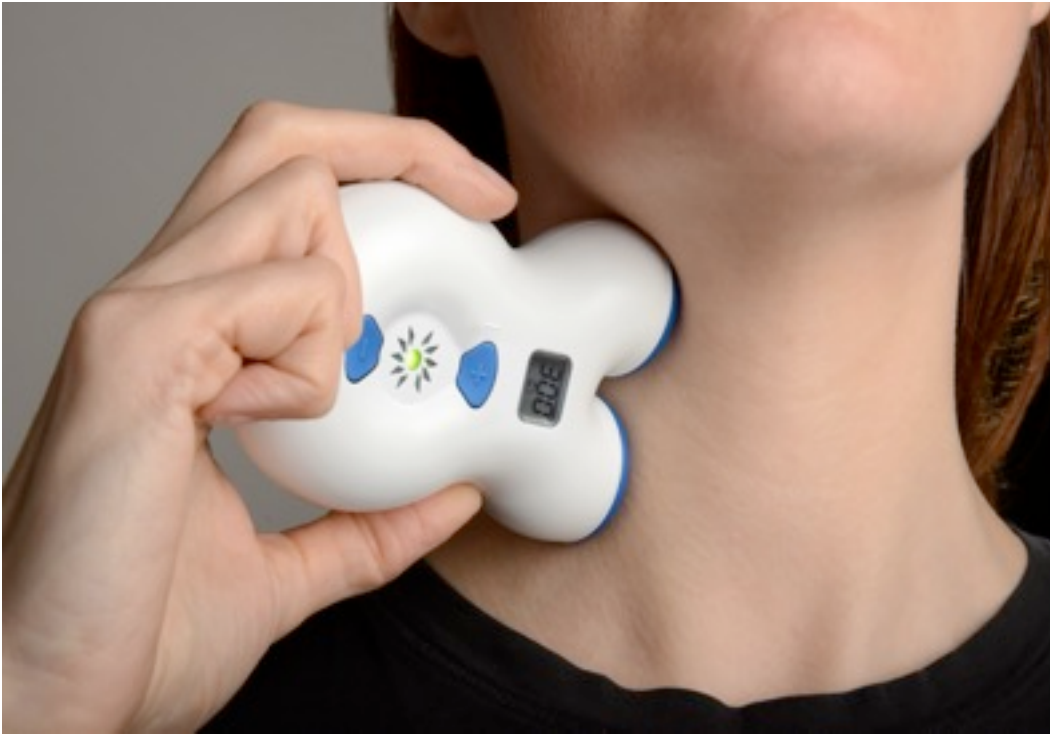

Image provided courtesy of electroCore LLC.
